# Supplementary material for: A Decade of Variability on Jakobshavn Isbrae: Ocean TemperaturesPace Speed Through Influence on Mélange Rigidity
Source: Copernicus journal article supplement (doi:10.5194/tc-2019-197), 2019-09-04
Supplement: Supplementary file 1 [file tc-2019-197-supplement.zip]

## Supplement to

### A Decade of Variability on Jakobshavn Isbrae: Ocean Temperatures Pace Speed Through Influence on Mélange Rigidity

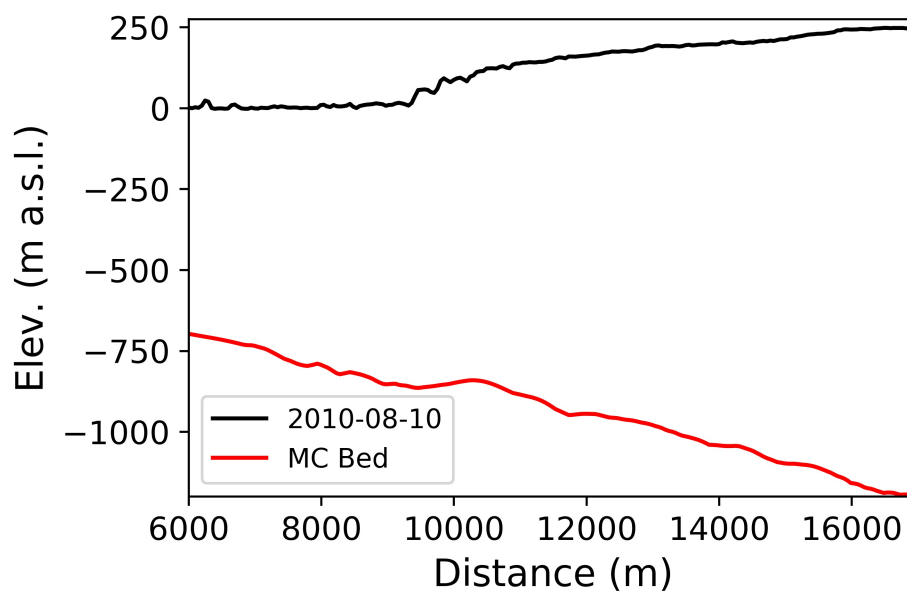

Figure S1. Surface elevation for August 8, 2010 (see also Fig. 3) and bed elevation extracted from BedMachine v3 (Morlighem et al., 2017) along the profile shown in Fig. 1.

#### See Supplemental Movie File: JakobshavnIsbrae.mov

Movie S1. Time series of Sentinel S1-A/B data showing the terminus of Jakobshavn Isbrae and the Ilulissat Icefjord from January 1, 2015 to June 21, 2019. Note images are extracted from mosaics that use acquisitions from multiple days to map the Greenland coastline each 6 (S1-A/B) or 12 (S1-A) day cycle. As a result, the dates represent the mid-point of the image sequence for each cycle and the dates for the actual image shown may differ by a few days. Source data are publicly available at <https://nsidc.org/data/measures/gimp> (NSIDC-0723).

Morlighem, M., Williams, C. N., Rignot, E., An, L., Arndt, J. E., Bamber, J. L., et al.  
(2017). BedMachine v3: Complete Bed Topography and Ocean Bathymetry Mapping of  
Greenland From Multibeam Echo Sounding Combined With Mass Conservation.  
*Geophysical Research Letters*, 44(21), 11051–11061.  
<http://doi.org/10.1002/2017GL074954>
